# Supplementary material
Source: PubMed Central journal article supplement (PMC4227151)
Supplement: cdd2014119x1.pdf [file cdd2014119x1.pdf]

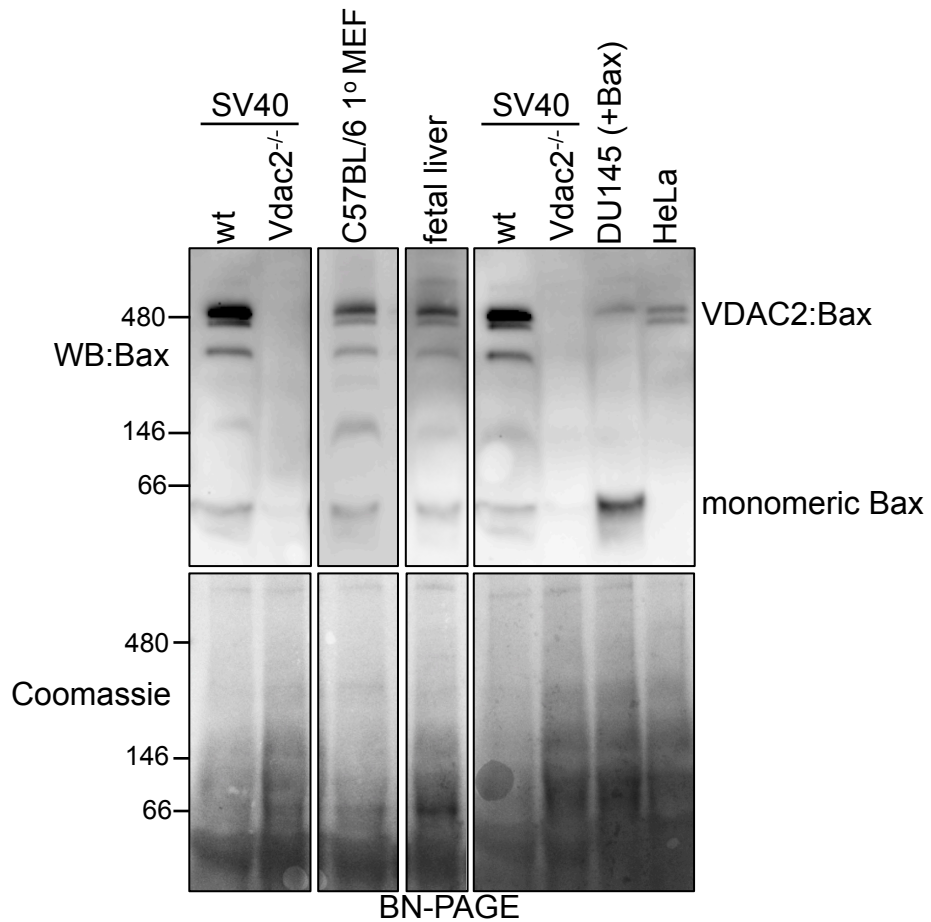

**Figure S1. Endogenous and ectopically expressed Bax associates with a large molecular weight mitochondrial complex.** Heavy membrane fractions from SV40 transformed wt or *Vdac2*<sup>-/-</sup> MEFs (mixed genetic background), untransformed early passage primary MEFs (C57BL/6), E14.5 fetal liver (C57BL/6), DU145 stably expressing hBax, or HeLa cells were solubilized in 1% digitonin prior to BN-PAGE and immunoblotting for Bax (*upper panels*) or Coomassie stained as a control for loading (*lower panels*).

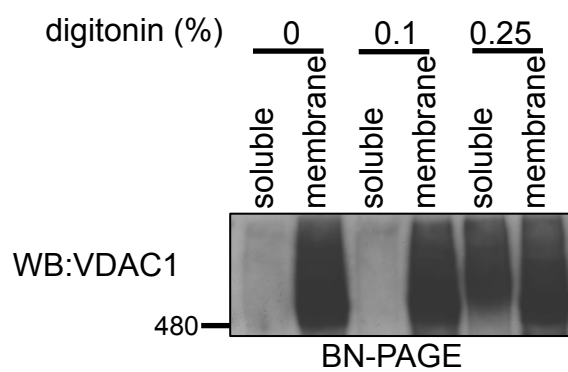

**Figure S2. Membrane-integrated VDAC1 is solubilized from the mitochondrial outer membrane with digitonin.** wt MEF membrane fraction was solubilized in the indicated concentrations (w/v) of digitonin prior to separation of soluble and membrane fractions by centrifugation and BN-PAGE. Note that VDAC1 remains in the membrane fraction unless solubilized with >0.25% digitonin.

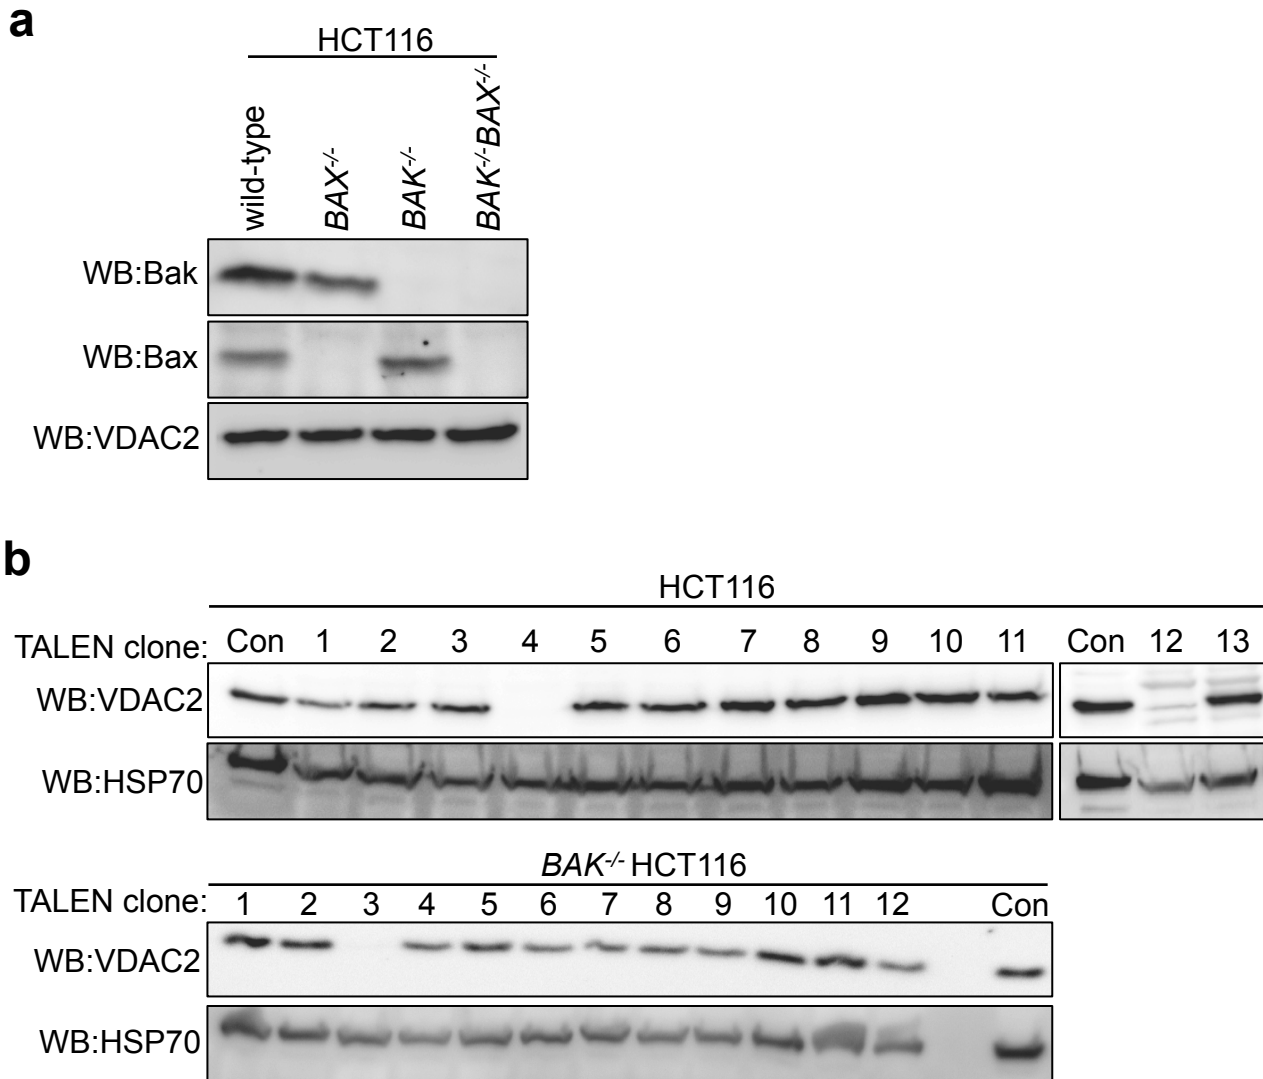

**Figure S3. Characterization of  $\Delta$ VDAC2 HCT116 cell lines.** (a) HCT116 cells of the indicated genotypes were immunoblotted for Bak, Bax or hVDAC2. (b) Screening of  $\Delta$ VDAC2 TALEN clones. Human *VDAC2* was disrupted using TALEN binding pairs targeting the common exon of human *VDAC2* isoforms in either wild-type (*upper panel*) or *BAK*<sup>-/-</sup> HCT116 cells (*lower panel*) and lysates immunoblotted for human VDAC2 or HSP70 as a loading control.

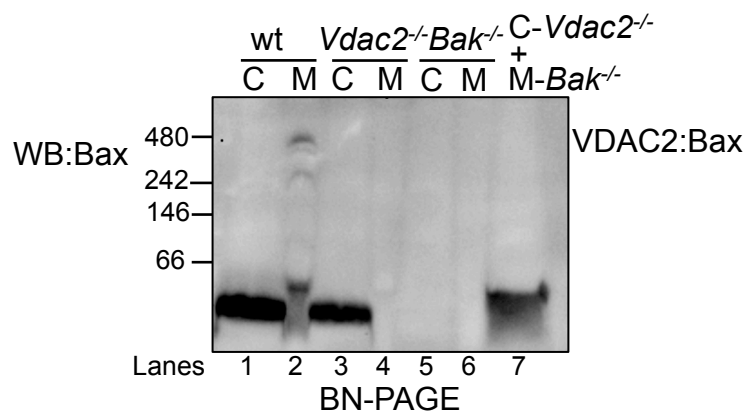

**Figure S4. VDAC2:Bax complex is not driven by digitonin.** Cytosol (C) and membrane (M) Fractions were isolated from the indicated MEFs. Membrane fractions were solubilized in 1% digitonin. Where indicated the membrane fraction from *Bak*<sup>-/-</sup> MEFs was resuspended in the cytosolic fraction from *Vdac2*<sup>-/-</sup> and 1% digitonin was added. Samples were then analyzed on BN-PAGE. Note the lack of the VDAC2:Bax complex when mitochondria lacking Bax were solubilized in presence of cytosolic Bax (*lane 7*). Note also the size shift of monomeric Bax in the absence (*lanes 1 and 3*) or presence (*lanes 2 and 7*) of 1% digitonin.

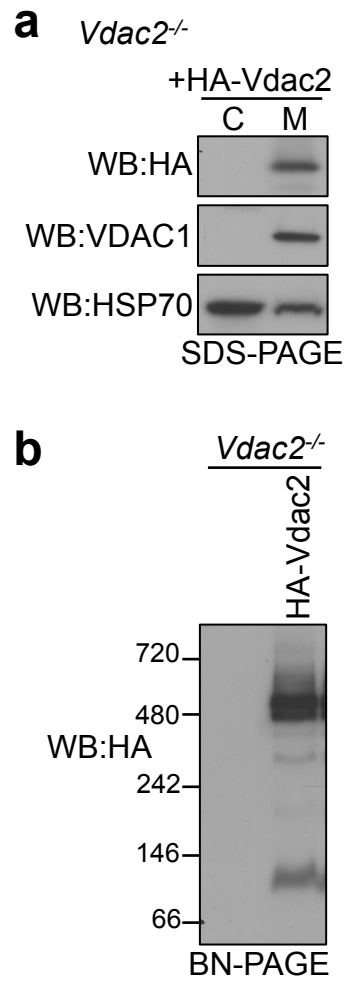

**Figure S5. Reconstituted HA-tagged VDAC2 localizes to a large molecular weight complex at mitochondria.** (a) *Vdac2*<sup>-/-</sup> MEFs stably expressing HA-VDAC2 were permeabilized and cytosol (C) and mitochondria-enriched heavy membrane fractions (M) were analyzed by SDS-PAGE. Data is representative of two independent experiments. (b) Reconstituted HA-tagged VDAC2 predominantly localizes to the 400 kDa complex. *Vdac2*<sup>-/-</sup> MEFs or *Vdac2*<sup>-/-</sup> MEFs stably expressing HA-VDAC2 were permeabilized and membrane fractions (M) were analyzed by BN-PAGE. Data is representative of two independent experiments.

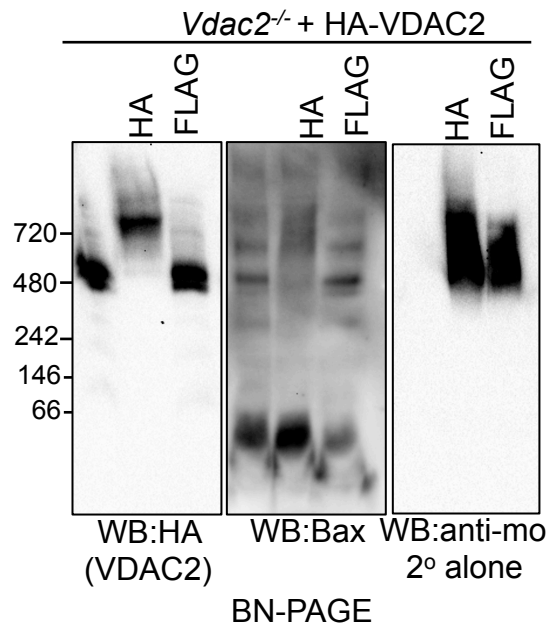

**Figure S6. Bax and VDAC2 reside in the same mitochondrial complex.** Membrane fraction from *Vdac2*<sup>-/-</sup> MEFs expressing HA-VDAC2 were incubated without antibody or with mouse monoclonal antibodies recognising either HA or FLAG as a control. Membranes were solubilized in digitonin prior to BN-PAGE and immunoblotted for Bax, HA or with an anti-mouse secondary antibody only.

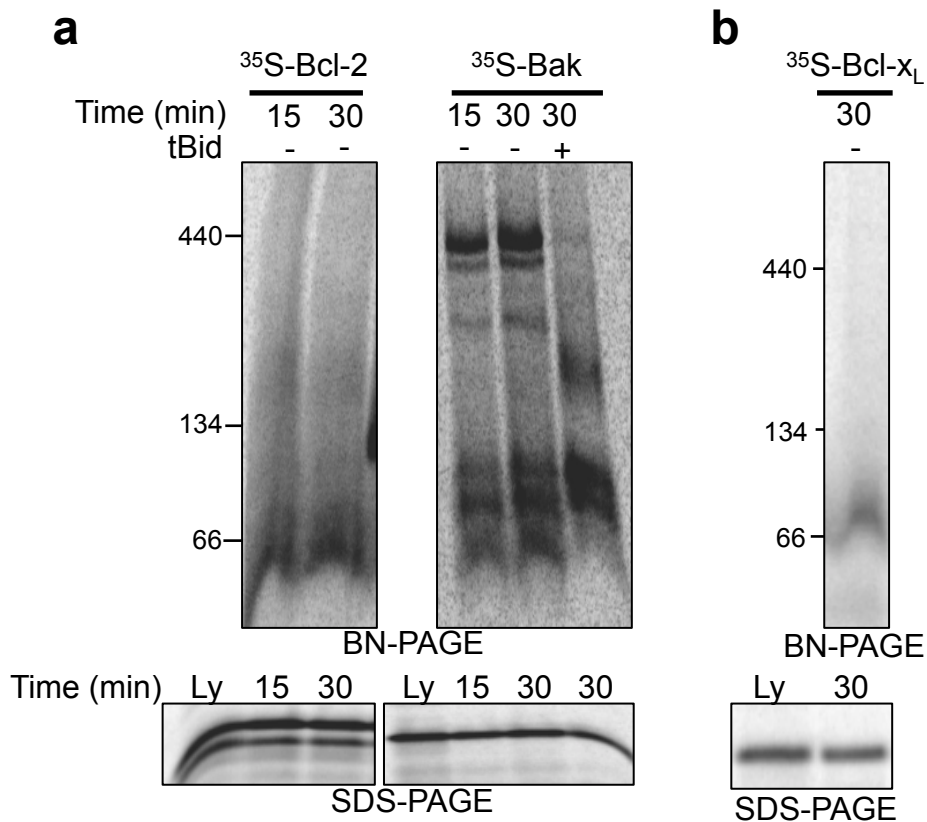

**Figure S7. Neither Bcl-x<sub>L</sub> or Bcl-2 associate with the VDAC2 complex.** Mitochondria isolated from wild-type MEFs were incubated with radiolabelled Bcl-2, Bak (**a**) or Bcl-x<sub>L</sub> (**b**) for the indicated times. Following import mitochondria were incubated with or without tBid where indicated prior to BN-PAGE or SDS-PAGE and autoradiography. Lysates (Ly) are translated <sup>35</sup>S-labelled protein, 20% input. In (a) the images are from the same gel but intervening lanes have been removed.

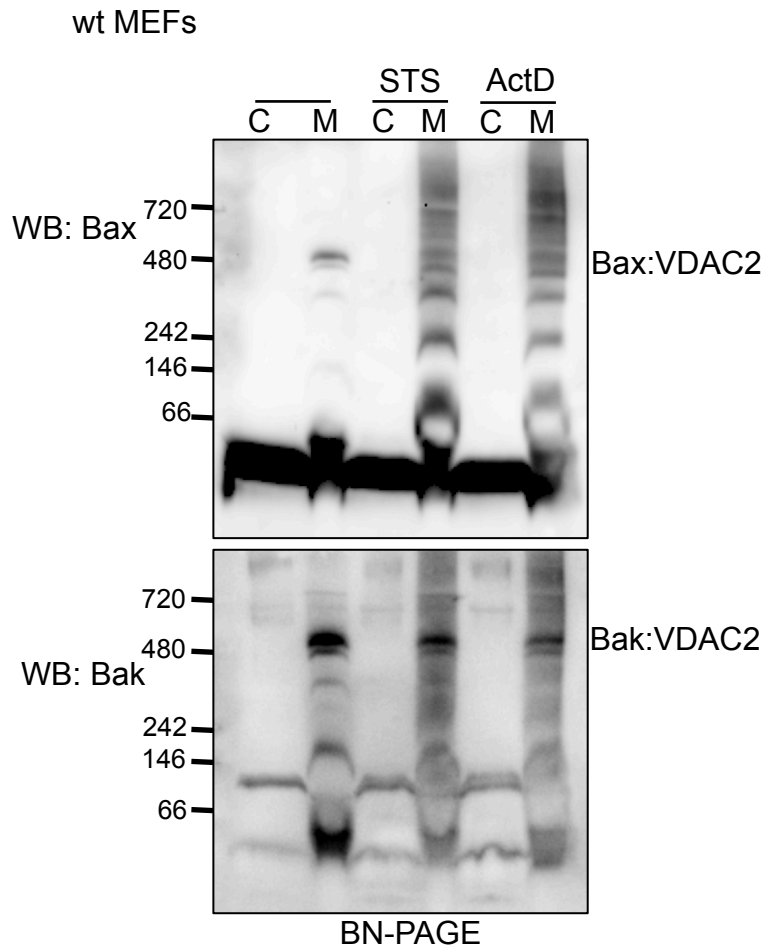

**Figure S8. Bax and Bak dissociate from the VDAC2 complex to self-associate in response to apoptotic stimuli.** wt MEFs were untreated or treated with staurosporine (0.1  $\mu$ M) or actinomycin D (1  $\mu$ M) for 24 h in the presence of Q-VD.oph (50  $\mu$ M). Cells were harvested and fractionated into cytosol (C) and membrane (M) and analyzed on BN-PAGE.



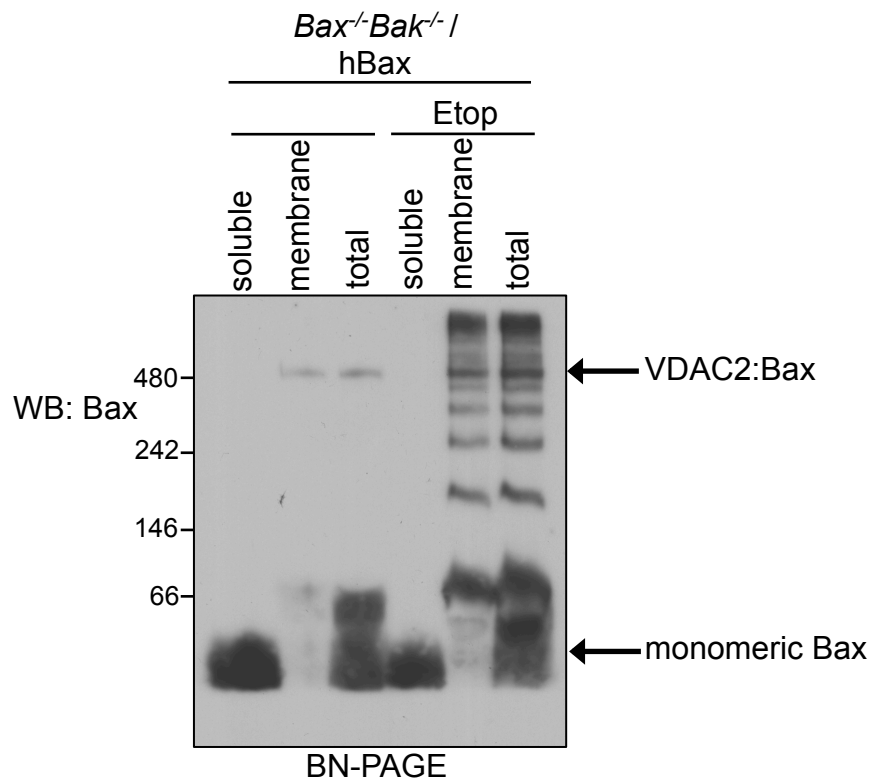

**Figure S9. Oligomerized Bax in healthy or apoptotic cells is membrane bound.** *Bak<sup>-/-</sup> Bak<sup>-/-</sup>* MEFs expressing hBax were treated or not with etoposide in the presence of Q.VD-oph. Cells were permeabilized in digitonin and the membrane fractions were resuspended in buffer without detergent, prior to separation into soluble and membrane-bound fractions. Membranes were solubilized in digitonin prior to BN-PAGE. Note that monomeric Bax was released from the membrane fraction upon resuspension whereas the VDAC2 complex in healthy cells and Bax homooligomers in etoposide-treated cells remained membrane bound.

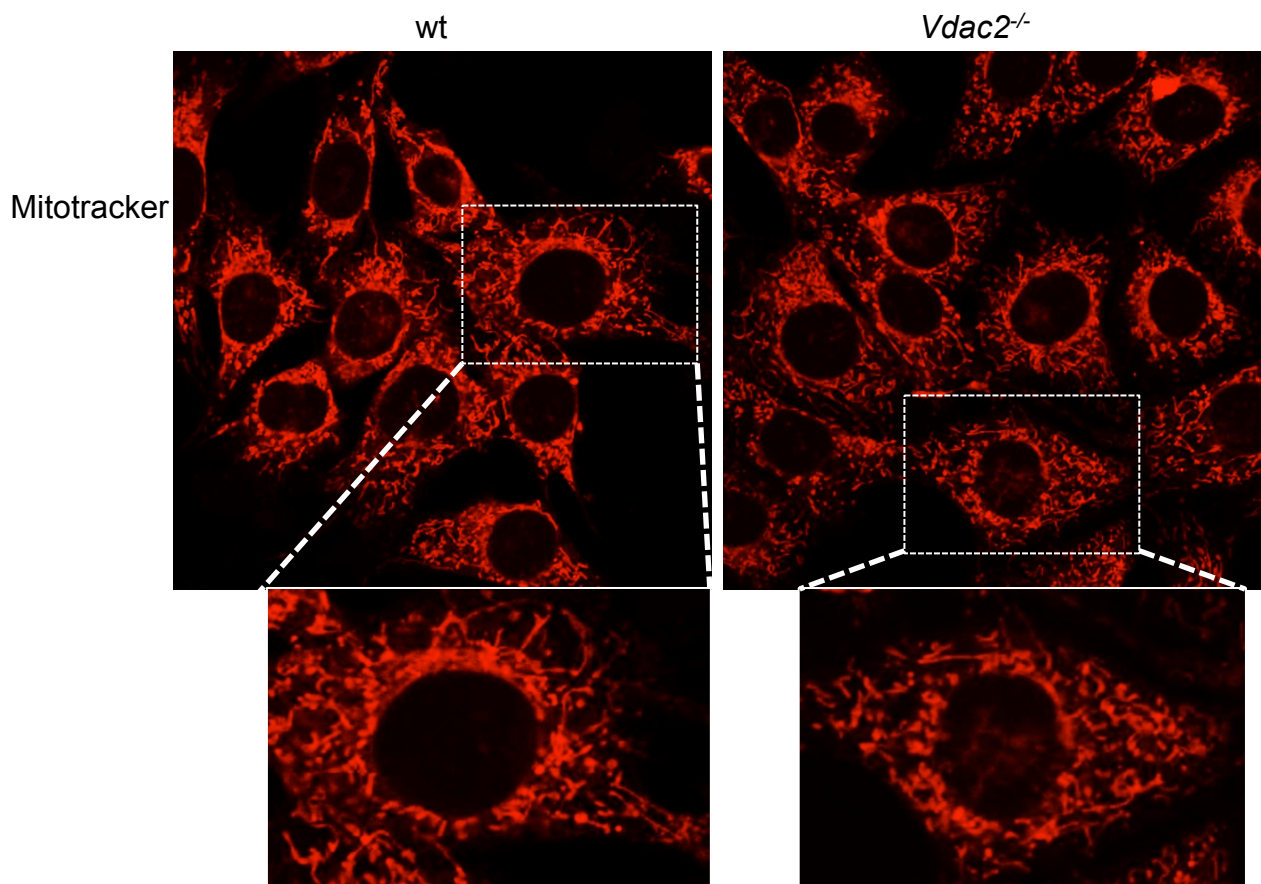

**Figure S10.** *Vdac2*<sup>-/-</sup> MEFs have grossly normal mitochondria dynamics. wt and *Vdac2*<sup>-/-</sup> MEFs were incubated with Mitotracker prior to confocal analysis.

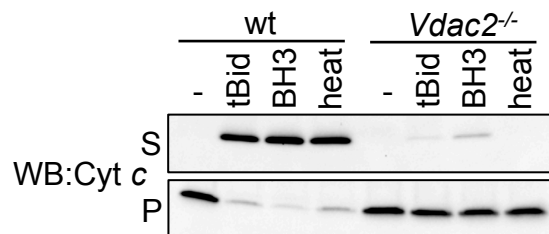

**Figure S11. Mitochondrial Bak in *Vdac2*<sup>-/-</sup> MEFs cannot mediate cytochrome *c* release.** Membrane fractions from wt or *Vdac2*<sup>-/-</sup> MEFs were treated with recombinant tBid or Bid BH3 peptide at 30°C for 30 mins, or alternatively incubated at 43°C for 30 mins in the absence of additional stimuli prior to separation of supernatant (S) and pellet (P) and immunoblotting for cytochrome *c*. Data is representative of three independent experiments.

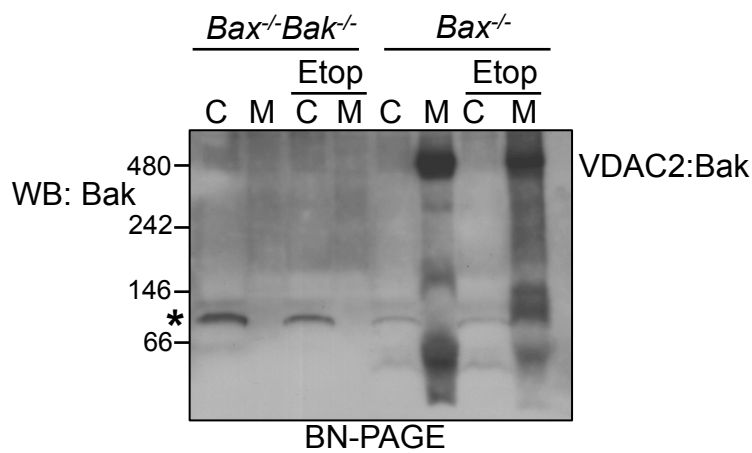

**Figure S12. Cytosolic band detected by the anti-Bak antibody on BN-PAGE is not Bak.**  $Bak^{-/-}Bax^{-/-}$  or  $Bax^{-/-}$  MEFs were treated or not with etoposide/Q-VD.oph and then permeabilized into cytosol (C) and membrane (M) fractions. Membranes were solubilized in digitonin and fractions analyzed on BN-PAGE. \* is a non-specific protein detected in  $Bak^{-/-}Bax^{-/-}$  cytosol with a rabbit polyclonal antibody (aa23-38) raised against Bak.
